# Supplementary material for: Controlling the Treatment Time for Ideal Morphology towards Efficient Organic Solar Cells
Source: MDPI journal article supplement (doi:10.3390/molecules27175713), 2022-09-05
Supplement: s1 [file s1]

## Supporting Information:

### Controlling the Treatment Time for Ideal Morphology Towards Efficient Organic Solar Cells

**Table S1.** Independent device results.

| PM6:SY1 | $V_{OC}$ (V) | $J_{SC}$ (mA cm <sup>-2</sup> ) | $FF$    | PCE (%)  |
|---------|--------------|---------------------------------|---------|----------|
| SVA 0s  |              |                                 |         |          |
|         | 0.86232      | 25.40275                        | 0.76617 | 16.78326 |
|         | 0.86054      | 25.29988                        | 0.75712 | 16.48362 |
|         | 0.86107      | 25.27381                        | 0.75963 | 16.53149 |
|         | 0.86006      | 25.39                           | 0.74973 | 16.37115 |
|         | 0.8691       | 25.13252                        | 0.77357 | 16.89696 |
|         | 0.86535      | 24.83365                        | 0.76179 | 16.37074 |
|         | 0.8632       | 24.66915                        | 0.75714 | 16.12275 |
|         | 0.86505      | 25.73804                        | 0.75691 | 16.8523  |
|         | 0.85954      | 25.33685                        | 0.69967 | 15.23743 |
|         | 0.86229      | 25.47181                        | 0.75006 | 16.47433 |
|         | 0.8617       | 25.31363                        | 0.74445 | 16.2386  |
|         | 0.86214      | 25.06508                        | 0.75777 | 16.37067 |
|         | 0.8663       | 25.06925                        | 0.75526 | 16.39054 |
|         | 0.86389      | 25.35031                        | 0.75757 | 16.5906  |
|         | 0.86231      | 25.03085                        | 0.75991 | 16.40196 |
|         | 0.86179      | 25.6489                         | 0.74667 | 16.50426 |
|         | 0.86357      | 25.54983                        | 0.75235 | 16.59986 |
|         | 0.85517      | 25.62077                        | 0.75724 | 16.58855 |
|         | 0.86503      | 25.49379                        | 0.75756 | 16.69219 |
|         | 0.86043      | 25.16645                        | 0.75484 | 16.34349 |
| SVA 30s |              |                                 |         |          |
|         | 0.87232      | 25.94175                        | 0.76656 | 17.34676 |
|         | 0.87054      | 25.79098                        | 0.75896 | 17.04026 |
|         | 0.87107      | 25.80325                        | 0.76034 | 17.08974 |
|         | 0.86633      | 26.05182                        | 0.76588 | 17.28553 |
|         | 0.87006      | 25.92195                        | 0.75043 | 16.92396 |
|         | 0.86389      | 25.86432                        | 0.77569 | 17.33192 |
|         | 0.86535      | 25.30333                        | 0.77927 | 17.05061 |
|         | 0.8632       | 25.83212                        | 0.76949 | 17.15825 |
|         | 0.86497      | 26.27337                        | 0.76762 | 17.44412 |
|         | 0.87029      | 25.81012                        | 0.77063 | 17.31027 |
|         | 0.86705      | 25.8021                         | 0.7765  | 17.37164 |
|         | 0.87014      | 25.97557                        | 0.76911 | 17.38389 |
|         | 0.8763       | 26.14804                        | 0.75772 | 17.36211 |

|         |         |          |         |          |
|---------|---------|----------|---------|----------|
|         | 0.86389 | 25.82984 | 0.76967 | 17.17448 |
|         | 0.86931 | 26.01743 | 0.77216 | 17.46429 |
|         | 0.86179 | 26.10684 | 0.77411 | 17.41396 |
|         | 0.86357 | 26.02554 | 0.7748  | 17.41364 |
|         | 0.8691  | 26.13782 | 0.77357 | 17.57284 |
|         | 0.86232 | 25.91886 | 0.77617 | 17.34772 |
|         | 0.86032 | 25.88623 | 0.77717 | 17.30155 |
| SVA 50s |         |          |         |          |
|         | 0.8579  | 25.64998 | 0.74056 | 16.29619 |
|         | 0.85643 | 26.11    | 0.73468 | 16.42845 |
|         | 0.85517 | 25.62077 | 0.75724 | 16.58855 |
|         | 0.85348 | 25.93532 | 0.73919 | 16.3523  |
|         | 0.85574 | 26.07902 | 0.73235 | 16.34276 |
|         | 0.86643 | 26.16645 | 0.73484 | 16.65983 |
|         | 0.86574 | 26.10636 | 0.73329 | 16.57215 |
|         | 0.86232 | 25.40275 | 0.76617 | 16.78326 |
|         | 0.86054 | 25.99885 | 0.75712 | 16.93562 |
|         | 0.86107 | 25.27381 | 0.75963 | 16.53149 |
|         | 0.86006 | 25.99    | 0.74973 | 16.75615 |
|         | 0.86535 | 25.33654 | 0.76179 | 16.70041 |
|         | 0.8632  | 25.66915 | 0.75714 | 16.76952 |
|         | 0.8617  | 25.97163 | 0.75036 | 16.7976  |
|         | 0.86214 | 25.46508 | 0.73777 | 16.20067 |
|         | 0.8663  | 25.66925 | 0.75526 | 16.79496 |
|         | 0.86389 | 25.35031 | 0.75757 | 16.5906  |
|         | 0.86231 | 25.53085 | 0.74991 | 16.50962 |
|         | 0.86179 | 25.6489  | 0.74667 | 16.50426 |
|         | 0.86357 | 25.54983 | 0.75235 | 16.59986 |

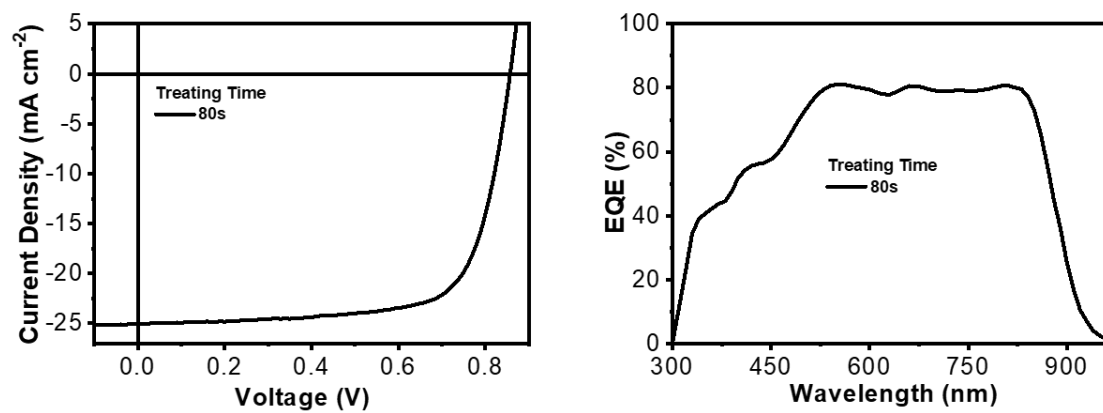

**Figure S1.**  $J$ - $V$  characteristics and EQE spectra for SVA 80s device.

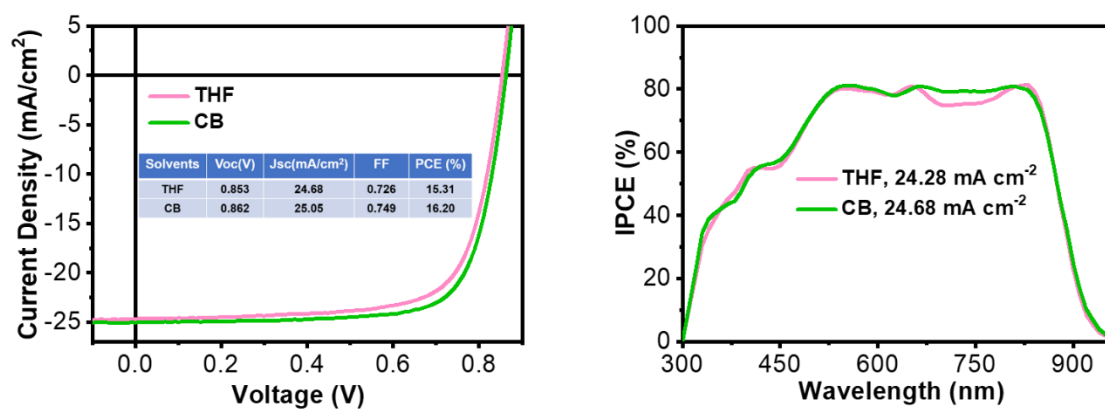

**Figure S2.**  $J$ - $V$  characteristics and EQE spectra for THF and CB treated devices.
